# Supplementary material
Source: publisher figshare collection journal article supplement (https://frontiersin.figshare.com/ndownloader/files/15743468)
Supplement: Supplementary file [file 15743468]

**Supplemental Table V. CpG site methylation in promoter regions in primary and cultured MCL cells.**

|                |                 | # of CpG sites with changed methylation |          |                          |          |
|----------------|-----------------|-----------------------------------------|----------|--------------------------|----------|
|                | Read depth >=10 | >=50% methylation change                |          | >=70% methylation change |          |
|                | Total site #    | Increase                                | Decrease | Increase                 | Decrease |
| RL-P==>RL1-C1* | 6665            | 0                                       | 3        | 0                        | 0        |
| RL-P==>RL1-C2  | 6665            | 3                                       | 1        | 0                        | 0        |
| RL-P==>RL2-C1  | 6665            | 1                                       | 1        | 0                        | 2        |
| RL-P==>RL2-C2  | 6665            | 6                                       | 1        | 0                        | 0        |

\*Abbreviations: RL-P; patient's primary MCL cells, RL1 and RL2; sub-lines of MCL-RL cell line, C1 and C2; cells cultured for 3 and 5 months, respectively.
